# Supplementary material for: Proprioceptive and Dual-Task Training: The Key of Stroke Rehabilitation, A Systematic Review
Source: MDPI journal article supplement (doi:10.3390/jfmk7030053), 2022-07-07
Supplement: s1 [file s1]

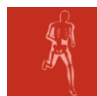

**Table S1.** Evidence level based on adapted Sackett's levels of evidence.

| Level | Study type                                                                                             | Studies                                                                                                                                                                                                                                                                                             |
|-------|--------------------------------------------------------------------------------------------------------|-----------------------------------------------------------------------------------------------------------------------------------------------------------------------------------------------------------------------------------------------------------------------------------------------------|
| 1a    | RCTs showing similar findings (PEDro Scale score $\geq 6$ )                                            | Ada 2003 [25], An 2014 [13], Baek 2021 [18], Cho 2015 [21], Choi 2014 [37], Fishbein 2019 [19], Hong 2020 [34], Iqbal 2020 [33], Kannan 2019 [35], Kim 2018 [22], Meester 2019 [23], Pang 2018 [28], Plummer 2021 [29], Saleh 2019 [36], Timmermans 2016 [20], Timmermans 2021 [24], Yang 2007 [31] |
| 1b    | RCTs with Narrow Confidence Intervals 3 (PEDro Scale score $\geq 6$ )                                  | -                                                                                                                                                                                                                                                                                                   |
| 2a    | RCT (PEDro Scale score =4-5)                                                                           | -                                                                                                                                                                                                                                                                                                   |
| 2b    | non-randomized controlled trial, Cohort Studies, Retrospective studies                                 | Her 2011 [14], Kim 2013 [26], Kim 2014 [32], Kim 2016 [40], Lee 2015 [27], Subramaniam 2014 [30]                                                                                                                                                                                                    |
| 2c    | Outcomes Research                                                                                      | -                                                                                                                                                                                                                                                                                                   |
| 3a    | Case-Controlled Studies                                                                                | -                                                                                                                                                                                                                                                                                                   |
| 3b    | 3B Case-controlled Study                                                                               | -                                                                                                                                                                                                                                                                                                   |
| 4     | Case Series, Poor Cohort Case-Controlled, Conflicting evidence of two or more equally designed studies | -                                                                                                                                                                                                                                                                                                   |
| 5     | Expert Opinion, RCTs with PEDro scores $\leq 3$ , case studies/case descriptions                       | -                                                                                                                                                                                                                                                                                                   |

Controlled Trials RCTs.

**Table S2.** Risk of bias summary for each included study and GRADE quality of evidence.

| Studies, year        | Random sequence generation | Allocation concealment | Blinding participants | Blinding of outcome assessment | Incomplete data | Selective reporting | Other bias | Risk of bias |
|----------------------|----------------------------|------------------------|-----------------------|--------------------------------|-----------------|---------------------|------------|--------------|
| Ada 2003 [25]        | +                          | +                      | +                     | +                              | +               | +                   | +          | Low          |
| An 2014 [13]         | +                          | +                      | -                     | -                              | +               | +                   | +          | Low          |
| Baek 2021 [18]       | +                          | +                      | -                     | -                              | +               | +                   | +          | Low          |
| Cho 2015 [21]        | +                          | +                      | -                     | -                              | +               | +                   | +          | Low          |
| Choi 2014 [37]       | +                          | +                      | +                     | +                              | +               | +                   | +          | Low          |
| Fishbein 2019 [19]   | +                          | +                      | +                     | +                              | +               | +                   | +          | Low          |
| Hong 2020 [34]       | +                          | +                      | -                     | -                              | +               | +                   | +          | Low          |
| Iqbal 2020 [33]      | +                          | +                      | -                     | -                              | +               | +                   | +          | Low          |
| Kannan 2019 [35]     | +                          | +                      | -                     | -                              | +               | +                   | +          | Low          |
| Kim 2018 [22]        | +                          | +                      | -                     | -                              | +               | +                   | +          | Low          |
| Meester 2019 [23]    | +                          | +                      | -                     | -                              | +               | +                   | +          | Low          |
| Pang 2018 [28]       | +                          | +                      | +                     | +                              | +               | +                   | +          | Low          |
| Plummer 2021 [29]    | +                          | +                      | -                     | -                              | +               | +                   | +          | Low          |
| Saleh 2019 [36]      | +                          | +                      | -                     | -                              | +               | +                   | +          | Low          |
| Timmermans 2016 [20] | +                          | +                      | +                     | +                              | +               | +                   | +          | Low          |
| Timmermans 2021 [24] | +                          | +                      | -                     | -                              | +               | +                   | +          | Low          |
| Yang 2007 [31]       | +                          | +                      | +                     | +                              | +               | +                   | +          | Low          |

| Studies, year | Bias due to confounding | Bias in selection of participants for the study | Bias in classification of interventions | Bias due to deviations from intended intervention | Bias due to missing data | Bias in measurement of outcomes | Bias in selection of the reported result | Risk of bias |
|---------------|-------------------------|-------------------------------------------------|-----------------------------------------|---------------------------------------------------|--------------------------|---------------------------------|------------------------------------------|--------------|
| Her 2011 [14] | +                       | +                                               | +                                       | +                                                 | +                        | +                               | +                                        | Low          |
| Kim 2013 [26] | +                       | +                                               | +                                       | +                                                 | +                        | +                               | +                                        | Low          |
| Kim 2014 [32] | +                       | +                                               | +                                       | +                                                 | +                        | +                               | +                                        | Low          |
| Kim 2016 [40] | +                       | +                                               | +                                       | +                                                 | +                        | +                               | +                                        | Low          |
| Lee 2015 [27] | +                       | +                                               | +                                       | +                                                 | +                        | +                               | +                                        | Low          |

|                              |   |   |   |   |   |   |   |     |
|------------------------------|---|---|---|---|---|---|---|-----|
| Subramania<br>m 2014<br>[30] | + | + | + | + | + | + | + | Low |
|------------------------------|---|---|---|---|---|---|---|-----|

| Quality assessment |                               |                             |                            |                      | Summery of findings                                                                                                                                                                | Quality of<br>Evidence<br>GRADE |
|--------------------|-------------------------------|-----------------------------|----------------------------|----------------------|------------------------------------------------------------------------------------------------------------------------------------------------------------------------------------|---------------------------------|
| N. of<br>studies   | Limitations                   | Inconsistency               | Indirectness               | Pubblication<br>bias | Sample characteristics                                                                                                                                                             |                                 |
| 23 studies         | No significant<br>limitations | No serious<br>inconsistency | No serious<br>indirectness | Unlikely             | Population: Stroke adults<br>Intervention: Proprioceptive<br>dual-task training<br>Comparison: Rehabilitation<br>strategies<br>Outcomes: Improvement of<br>balance, gait, autonomy | High                            |

+ indicates reporting in full with low risk of bias; / indicates partial reporting with unclear risk of bias; - indicates no reporting with high risk of bias.
